# Supplementary material for: Tuning the photophysical properties of carboranyl luminophores by closo- to nido-carborane conversion and application to OFF–ON fluoride sensing
Source: Royal Society of Chemistry journal article supplement (doi:10.1039/c8dt03771j), 2018-01-01
Supplement: c8dt03771j1.pdf [file c8dt03771j1.pdf]

## Electronic Supplementary Information

### Tuning the photophysical properties of carboranyl luminophores by *closo-* to *nido-*carborane conversion and application to OFF-ON fluoride sensing

Nguyen Van Nghia,<sup>a,b</sup> Jihun Oh,<sup>a</sup> Surendran Sujith,<sup>a</sup> Jaehoon Jung\*<sup>a</sup> and Min Hyung Lee\*<sup>a</sup>

<sup>a</sup> Department of Chemistry, University of Ulsan, Ulsan 44610, Republic of Korea

<sup>b</sup> Institute of Research and Development, Duy Tan University, Da Nang 550000, Vietnam

#### Contents

|                               |     |
|-------------------------------|-----|
| 1. Experimental data.....     | S2  |
| 2. Computational details..... | S14 |

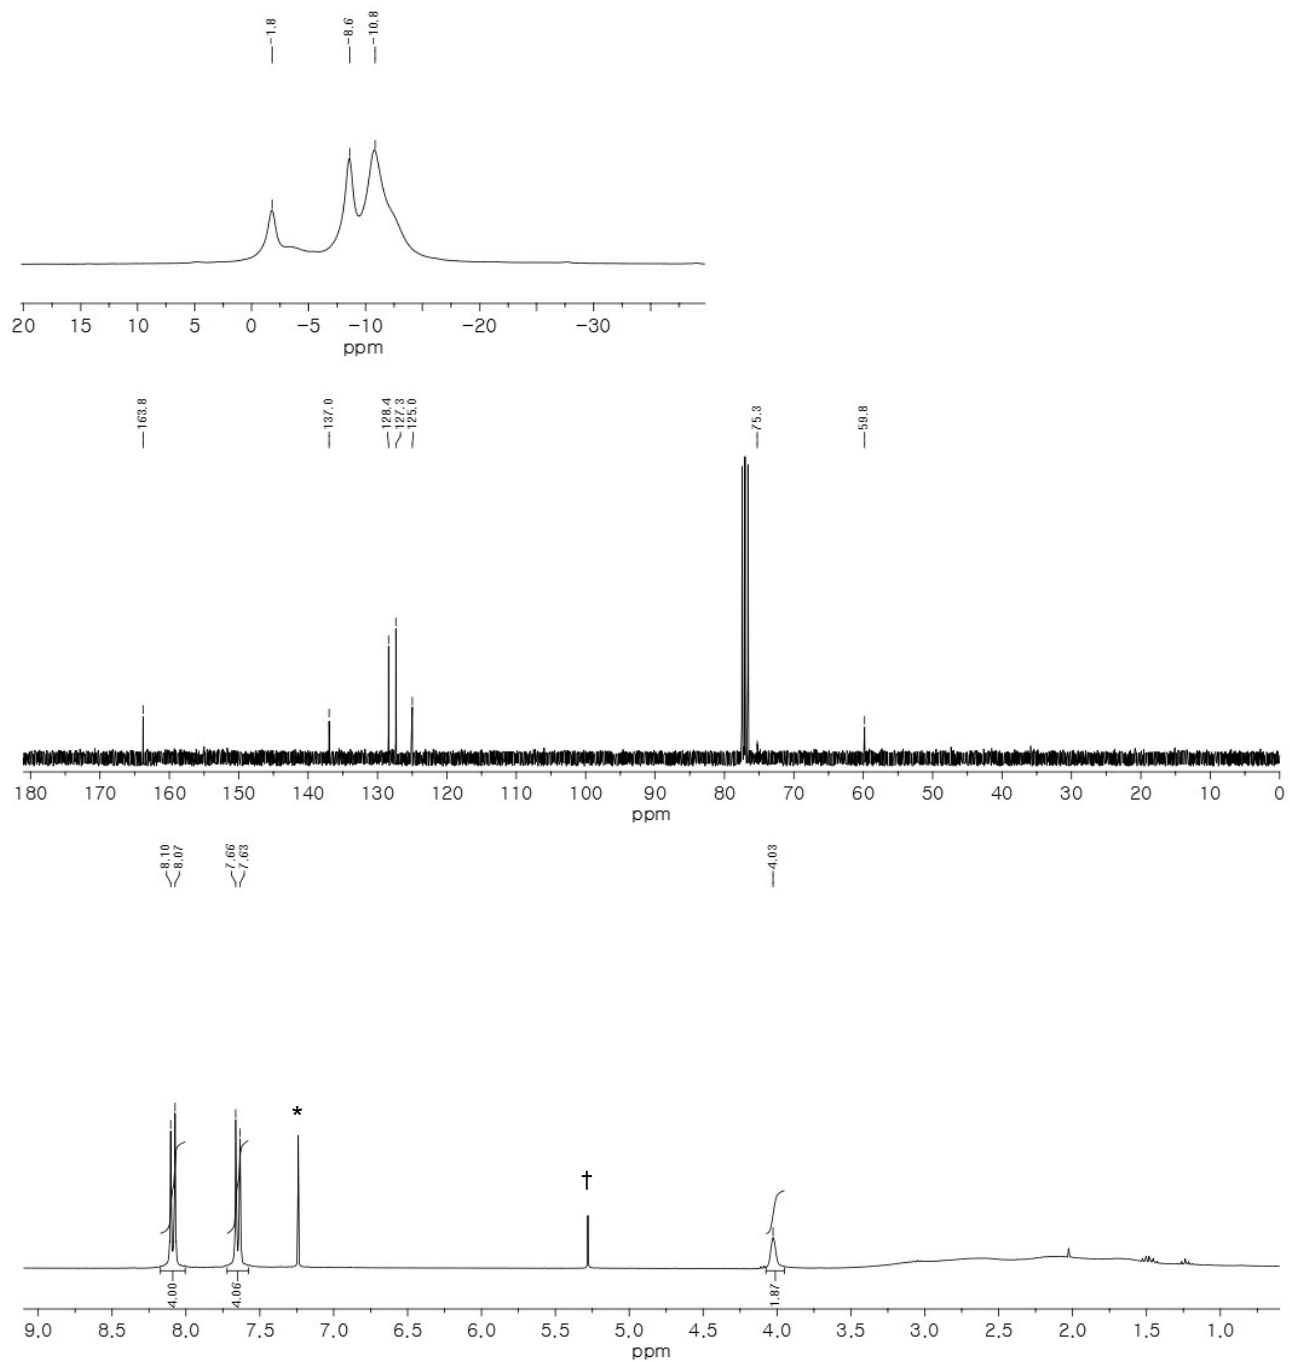

**Fig. S1.**  $^{11}\text{B}$  (top),  $^{13}\text{C}$  (middle), and  $^1\text{H}$  (bottom) NMR spectra of *closo*-OXD1 (\* and † from  $\text{CDCl}_3$  and  $\text{CH}_2\text{Cl}_2$ , respectively).

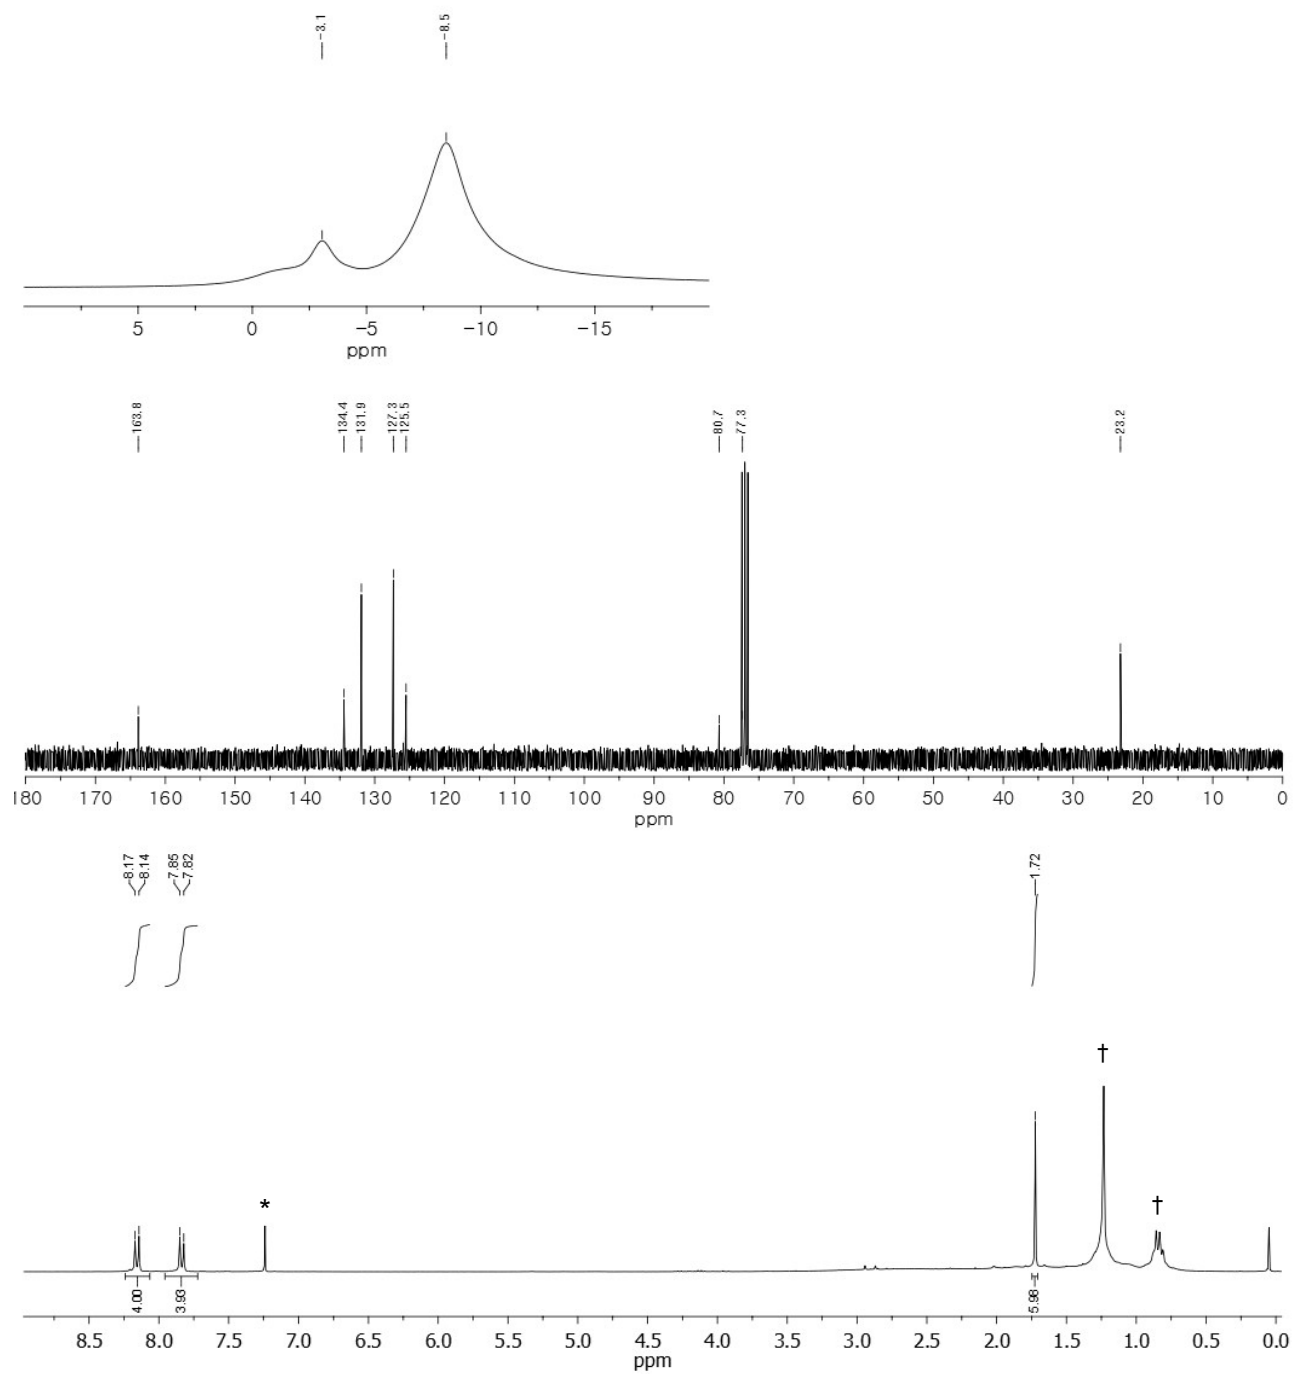

**Fig. S2.**  $^{11}\text{B}$  (top),  $^{13}\text{C}$  (middle), and  $^1\text{H}$  (bottom) NMR spectra of *closo-OXD2* (\* and † from  $\text{CDCl}_3$  and *n*-hexane, respectively).

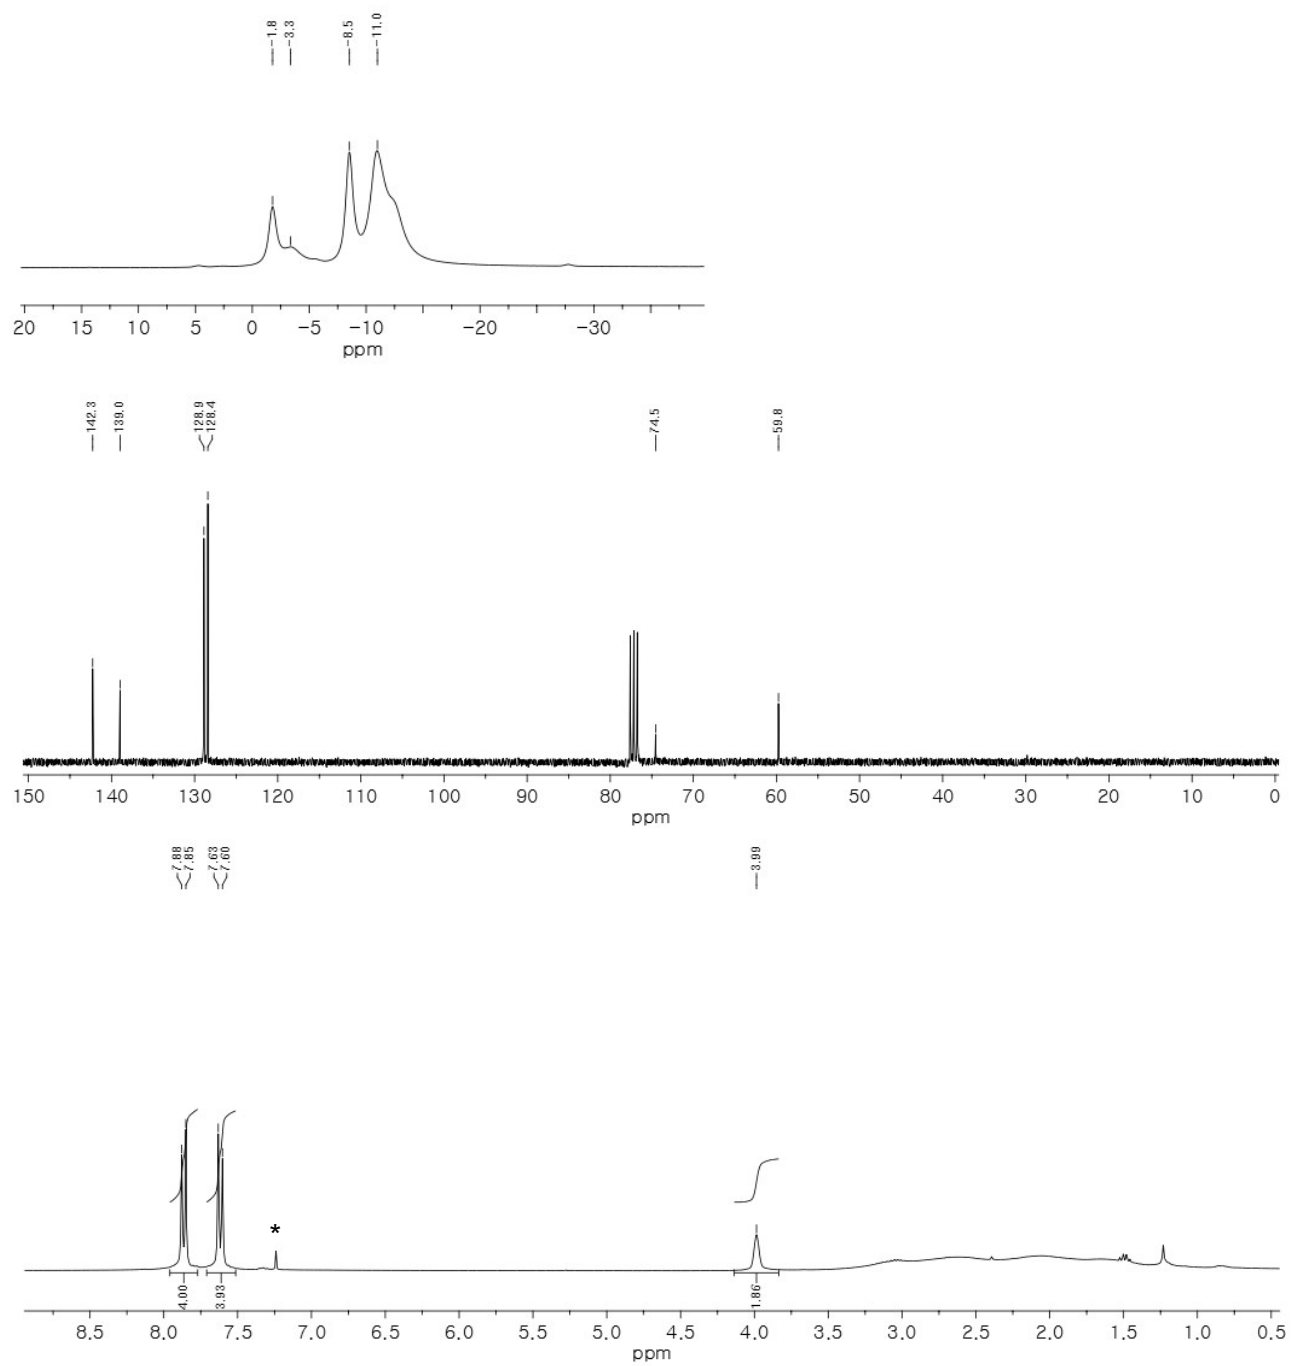

**Fig. S3.**  $^{11}\text{B}$  (top),  $^{13}\text{C}$  (middle), and  $^1\text{H}$  (bottom) NMR spectra of *closo-DPS1* (\* from  $\text{CDCl}_3$ ).

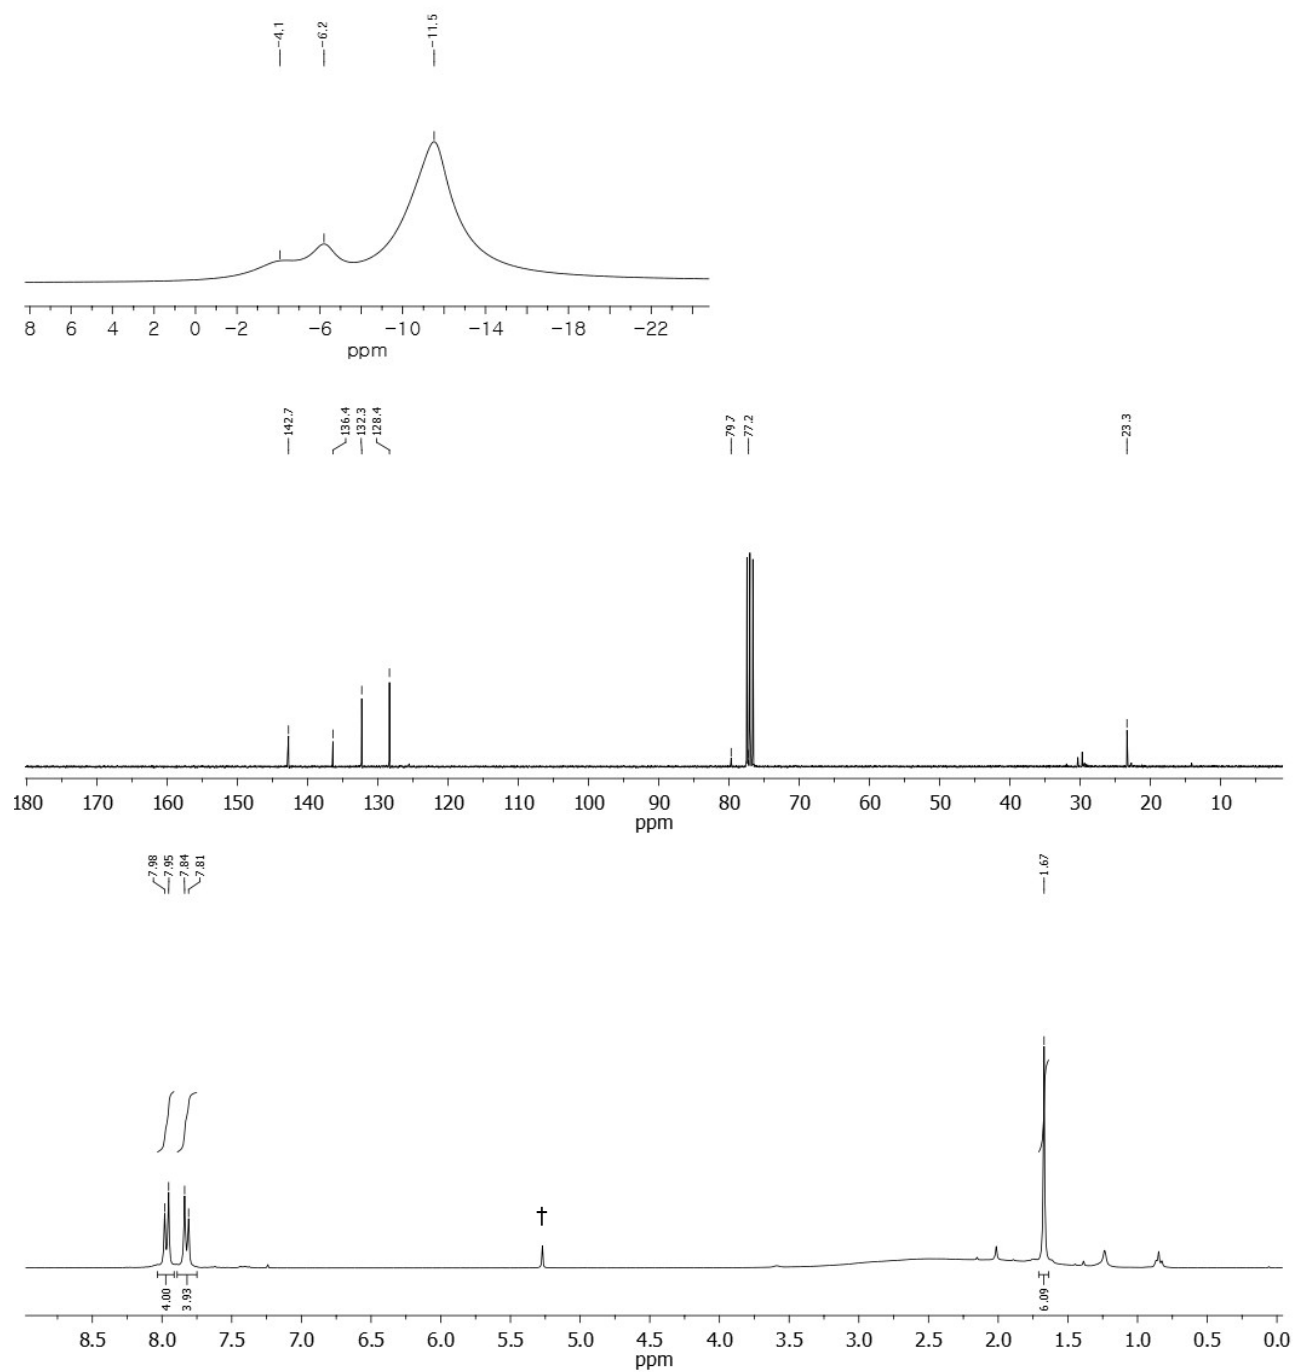

**Fig. S4.** <sup>11</sup>B (top), <sup>13</sup>C (middle), and <sup>1</sup>H (bottom) NMR spectra of *closo-DPS2* († from CH<sub>2</sub>Cl<sub>2</sub>).

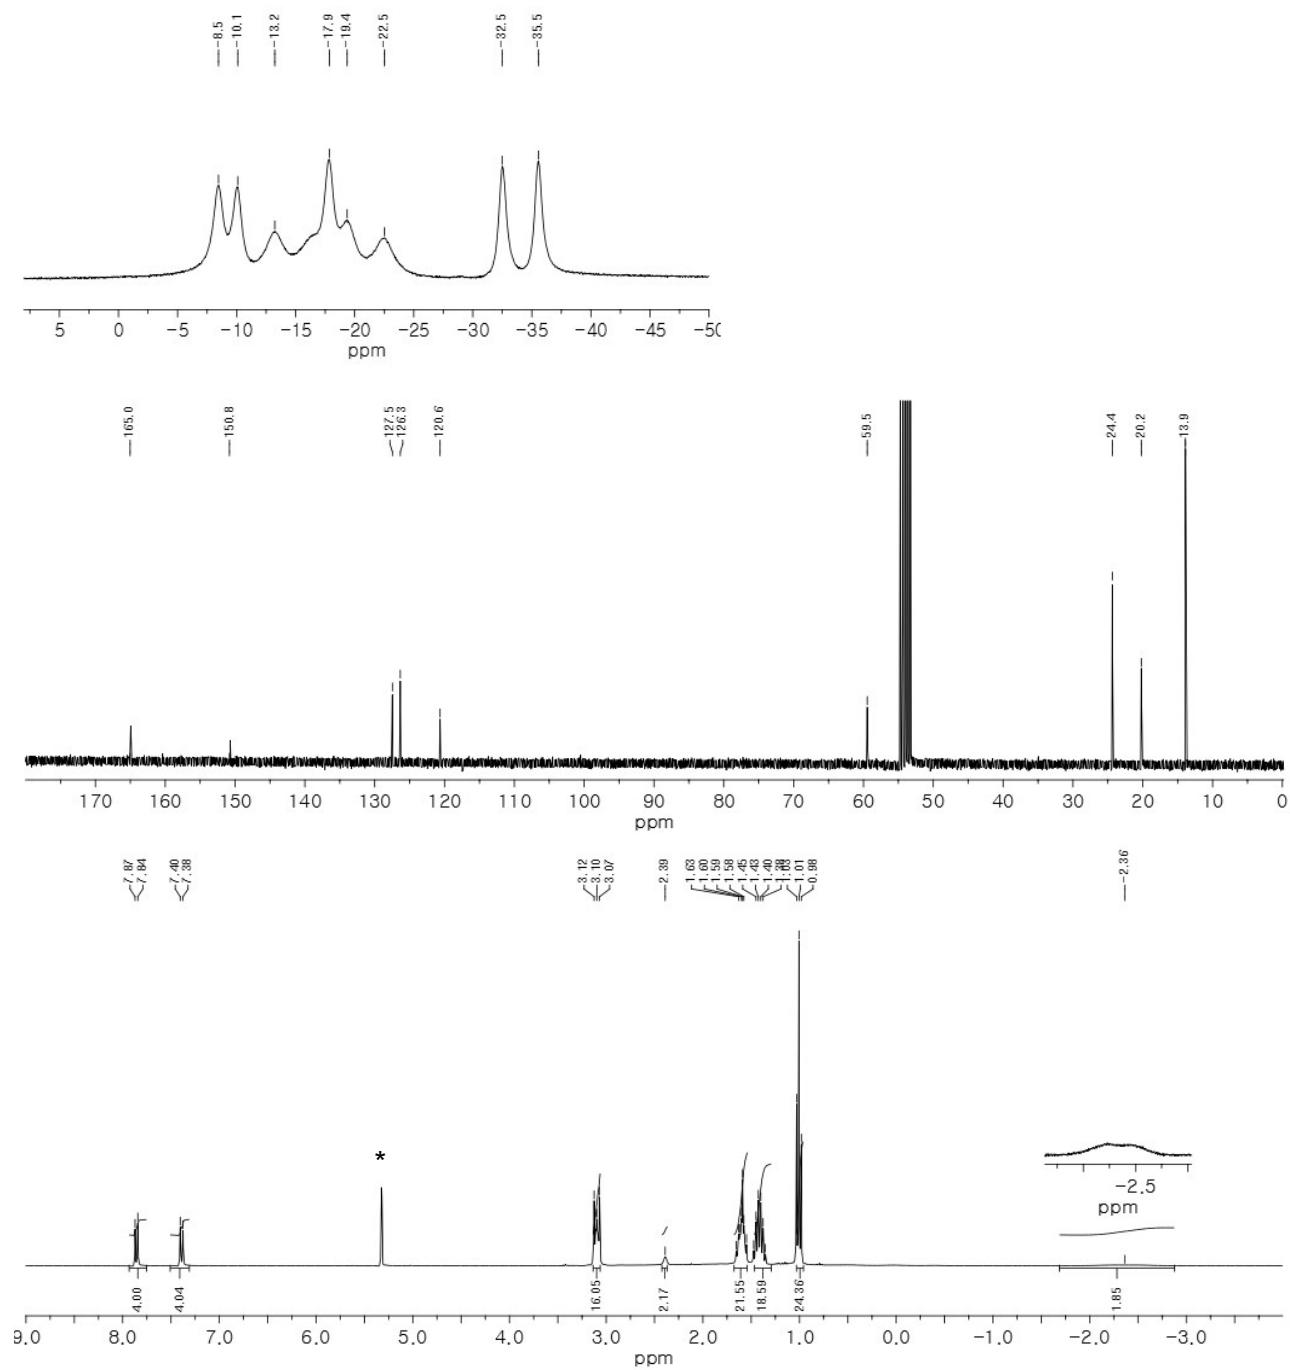

**Fig. S5.** <sup>11</sup>B (top), <sup>13</sup>C (middle), and <sup>1</sup>H (bottom) NMR spectra of *nido*-OXD1 (\* from CD<sub>2</sub>Cl<sub>2</sub>).

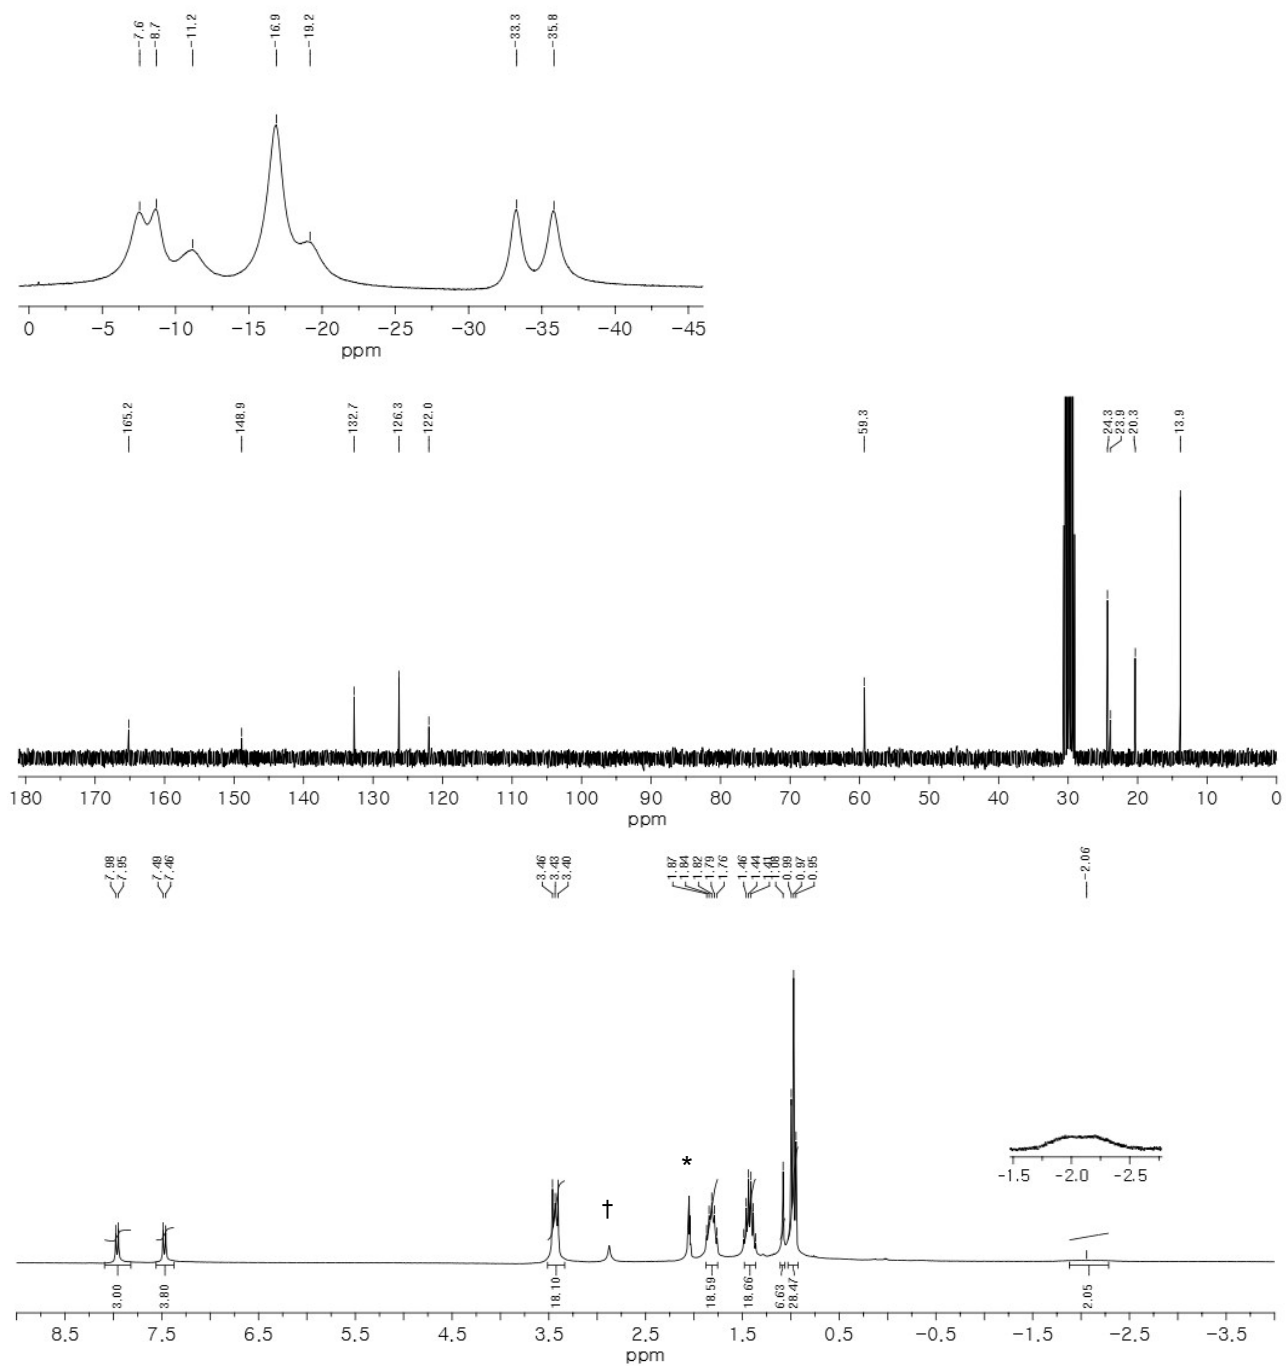

**Fig. S6.**  $^{11}\text{B}$  (top),  $^{13}\text{C}$  (middle), and  $^1\text{H}$  (bottom) NMR spectra of *nido*-OXD2 (\* and † from acetone- $d_6$  and  $\text{H}_2\text{O}$ , respectively).

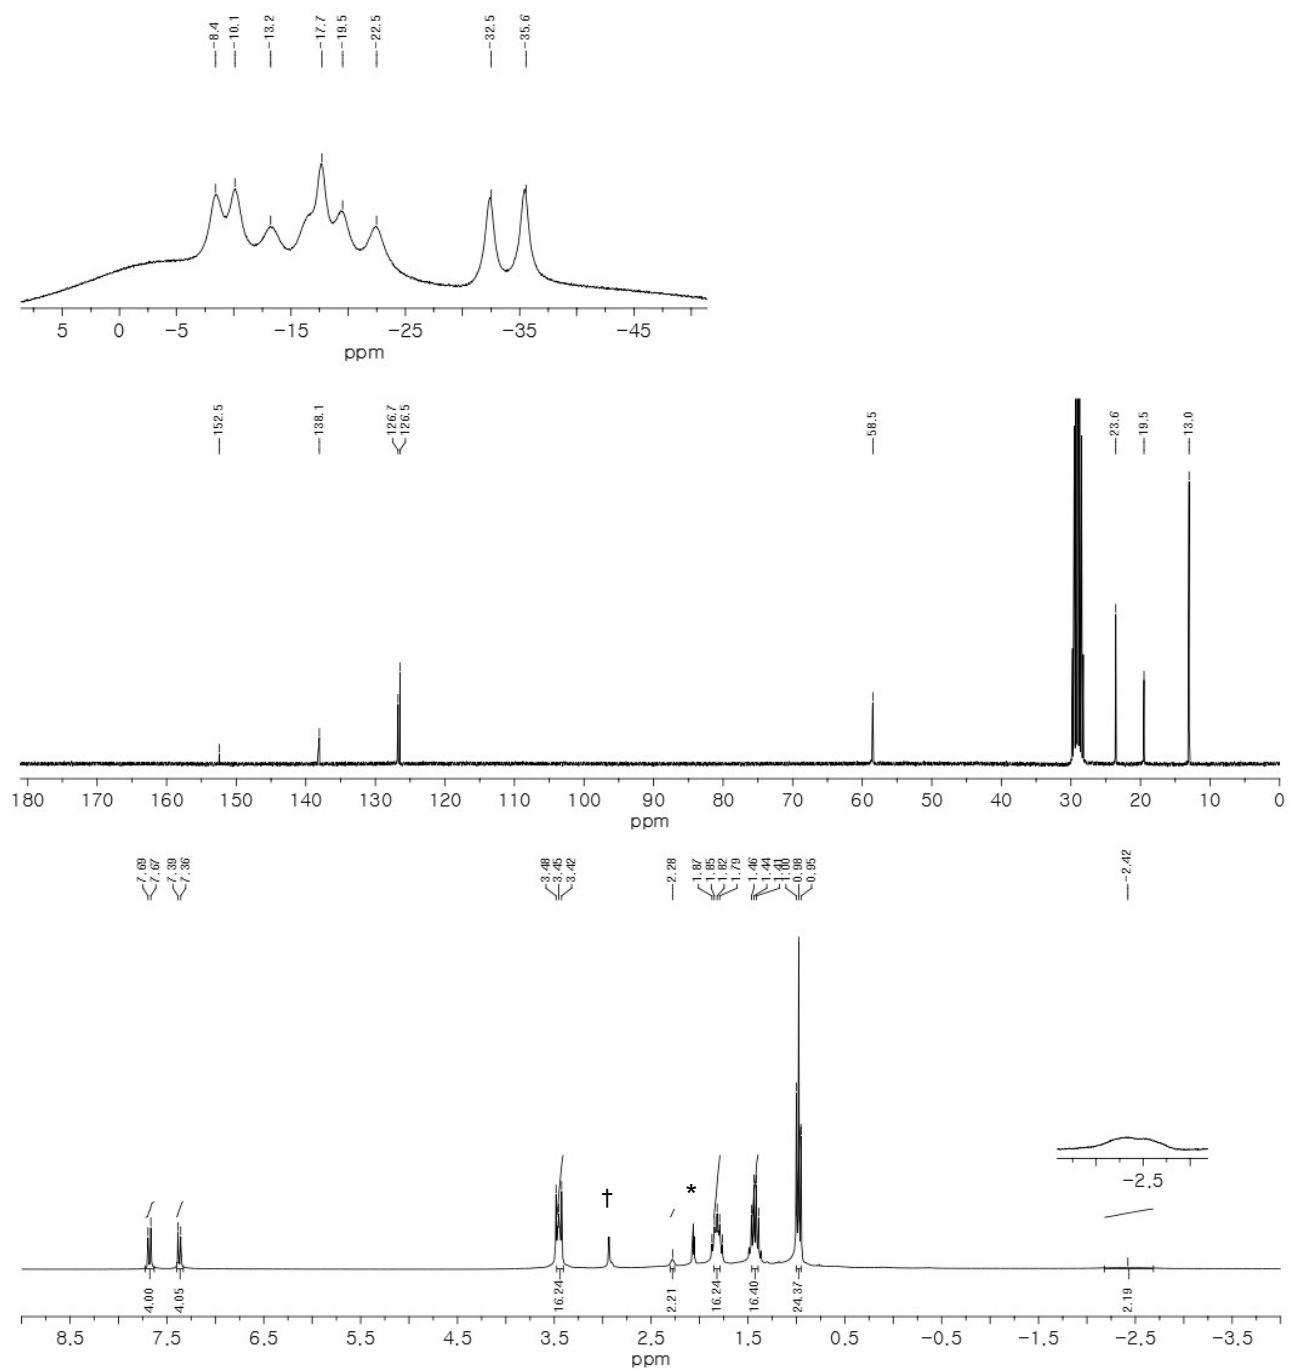

**Fig. S7.** <sup>11</sup>B (top), <sup>13</sup>C (middle), and <sup>1</sup>H (bottom) NMR spectra of *nido*-DPS1 (\* and † from acetone-*d*<sub>6</sub> and H<sub>2</sub>O, respectively).



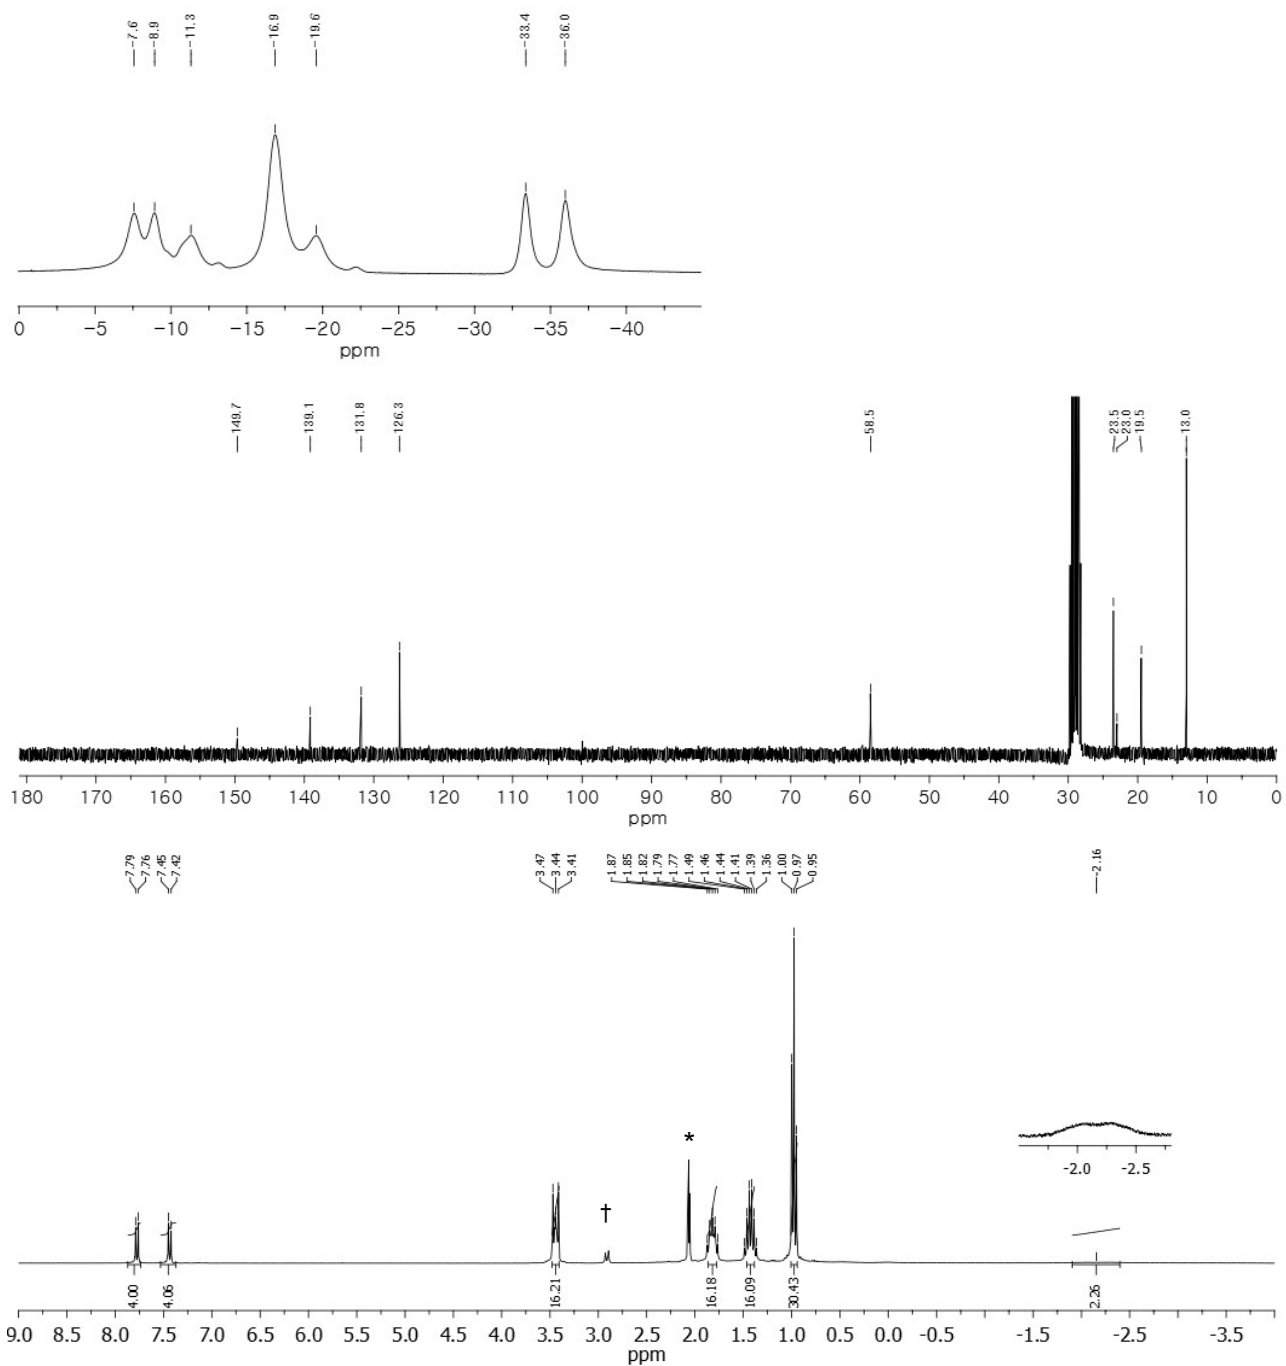

**Fig. S8.** <sup>11</sup>B (top), <sup>13</sup>C (middle), and <sup>1</sup>H (bottom) NMR spectra of *nido*-DPS2 (\* and † from acetone-*d*<sub>6</sub> and H<sub>2</sub>O, respectively).

**Table S1.** Crystallographic data and parameters for *closo-OXD1*.

|                                                             | <i>closo-OXD1</i>                                                |
|-------------------------------------------------------------|------------------------------------------------------------------|
| formula                                                     | C <sub>18</sub> H <sub>30</sub> B <sub>20</sub> N <sub>2</sub> O |
| formula weight                                              | 506.64                                                           |
| crystal system                                              | Monoclinic                                                       |
| space group                                                 | <i>P</i> 2 <sub>1</sub> / <i>n</i>                               |
| <i>a</i> (Å)                                                | 12.56330(10)                                                     |
| <i>b</i> (Å)                                                | 12.09970(10)                                                     |
| <i>c</i> (Å)                                                | 18.4978(2)                                                       |
| $\alpha$ (°)                                                | 90                                                               |
| $\beta$ (°)                                                 | 97.7708(6)                                                       |
| $\gamma$ (°)                                                | 90                                                               |
| <i>V</i> (Å <sup>3</sup> )                                  | 2786.07(4)                                                       |
| <i>Z</i>                                                    | 4                                                                |
| $\rho_{\text{calc}}$ (g cm <sup>-3</sup> )                  | 1.208                                                            |
| $\mu$ (mm <sup>-1</sup> )                                   | 0.062                                                            |
| <i>F</i> (000)                                              | 1040                                                             |
| <i>T</i> (K)                                                | 173(2)                                                           |
| <i>hkl</i> range                                            | -16 → +16, -12 → +16, -24 → +24                                  |
| measd reflns                                                | 27843                                                            |
| unique reflns [ <i>R</i> <sub>int</sub> ]                   | 6868 [0.0327]                                                    |
| reflns used for refinement                                  | 6868                                                             |
| refined parameters                                          | 370                                                              |
| <i>R</i> 1 <sup><i>a</i></sup> ( <i>I</i> > 2σ( <i>I</i> )) | 0.0539                                                           |
| w <i>R</i> 2 <sup><i>b</i></sup> all data                   | 0.1556                                                           |
| GOF on <i>F</i> <sup>2</sup>                                | 1.041                                                            |
| $\rho_{\text{fin}}$ (max/min) (e Å <sup>-3</sup> )          | 0.381/-0.336                                                     |

<sup>*a*</sup>  $R1 = \sum ||F_o| - |F_c|| / \sum |F_o|$ . <sup>*b*</sup>  $wR2 = \{[\sum w(F_o^2 - F_c^2)^2] / [\sum w(F_o^2)^2]\}^{1/2}$ .

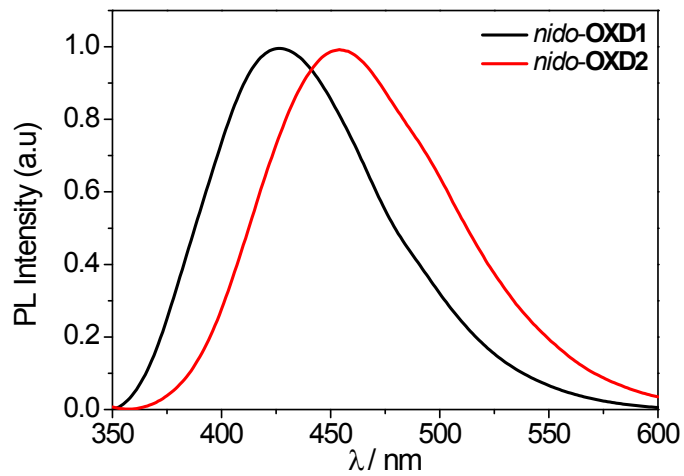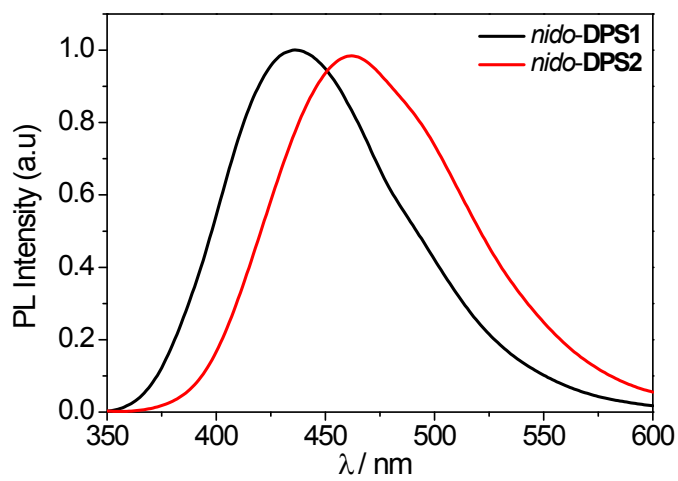

**Fig. S9.** PL spectra of (top) *nido*-OXD1–2 and (bottom) *nido*-DPS1–2 in 10 wt%-doped PMMA film.

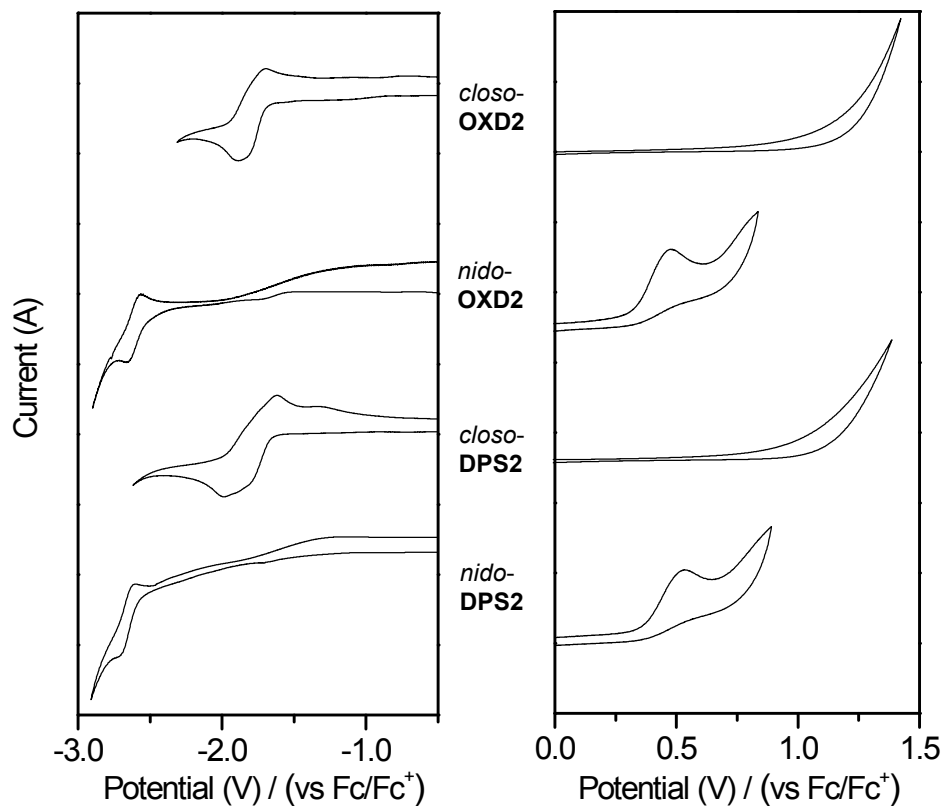

**Fig. S10.** Cyclic voltammograms of *closo*/*nido*-OXD2 and *closo*/*nido*-DPS2 showing reduction (left) and oxidation (right) ( $1.0 \times 10^{-3}$  M in DMF except for reduction of *nido*-DPS2 (MeCN), scan rate = 100–200 mV/s).

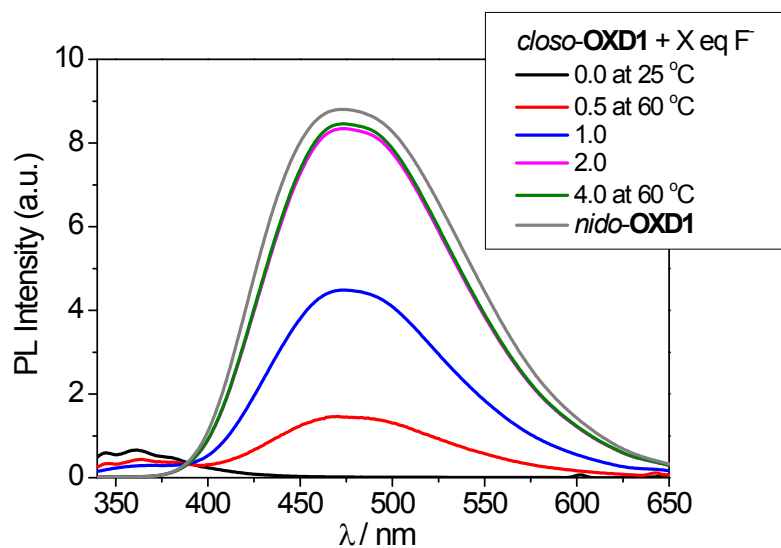

**Fig. S11.** Spectral change in the fluorescence of *closo-OXD1* ( $2 \times 10^{-5}$  M in THF) in the presence of different amounts of fluoride after heating at 60 °C for 2 h ( $\lambda_{\text{ex}} = 320$  nm).

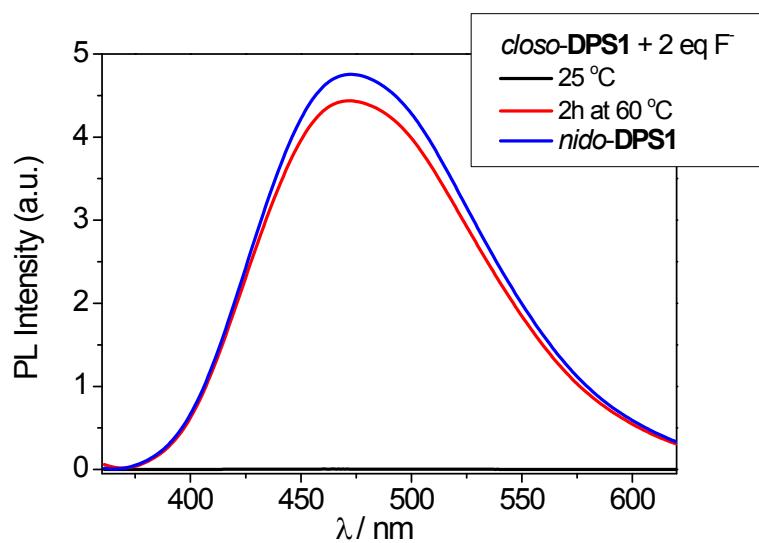

**Fig. S12.** Spectral change in the fluorescence of *closo-DPS1* ( $2 \times 10^{-5}$  M in THF) in the presence of 2 equiv of fluoride at 60 °C for 2 h ( $\lambda_{\text{ex}} = 320$  nm).

## Computational Details

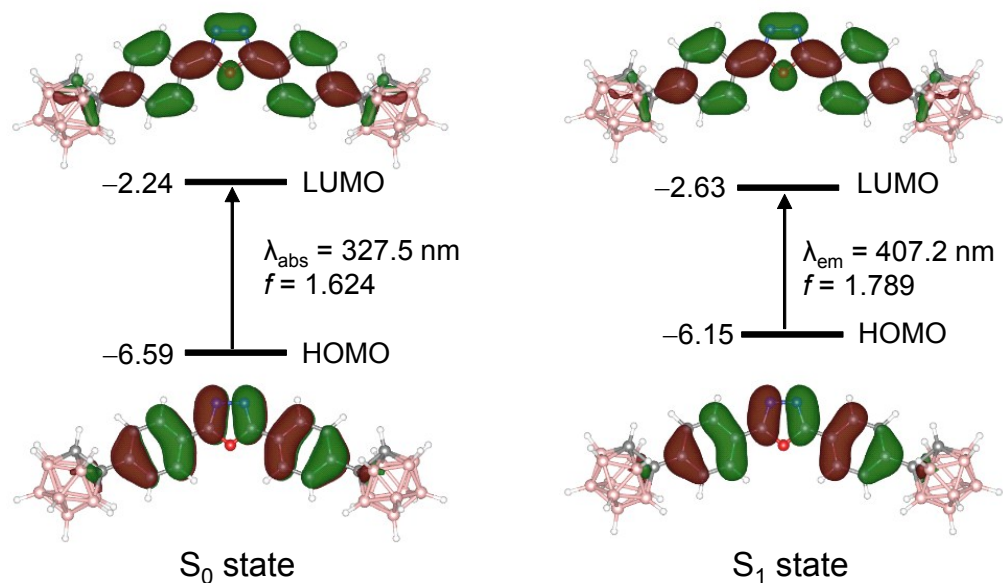

**Fig. S13.** Frontier molecular orbital diagrams and energies (eV) from DFT calculation (PCM in THF) of *closo*-OXD1 (left) in the ground state (S<sub>0</sub>) and (right) in the lowest singlet excited state (S<sub>1</sub>) geometries. The transition energy (in nm) was calculated using the TD-B3LYP method.

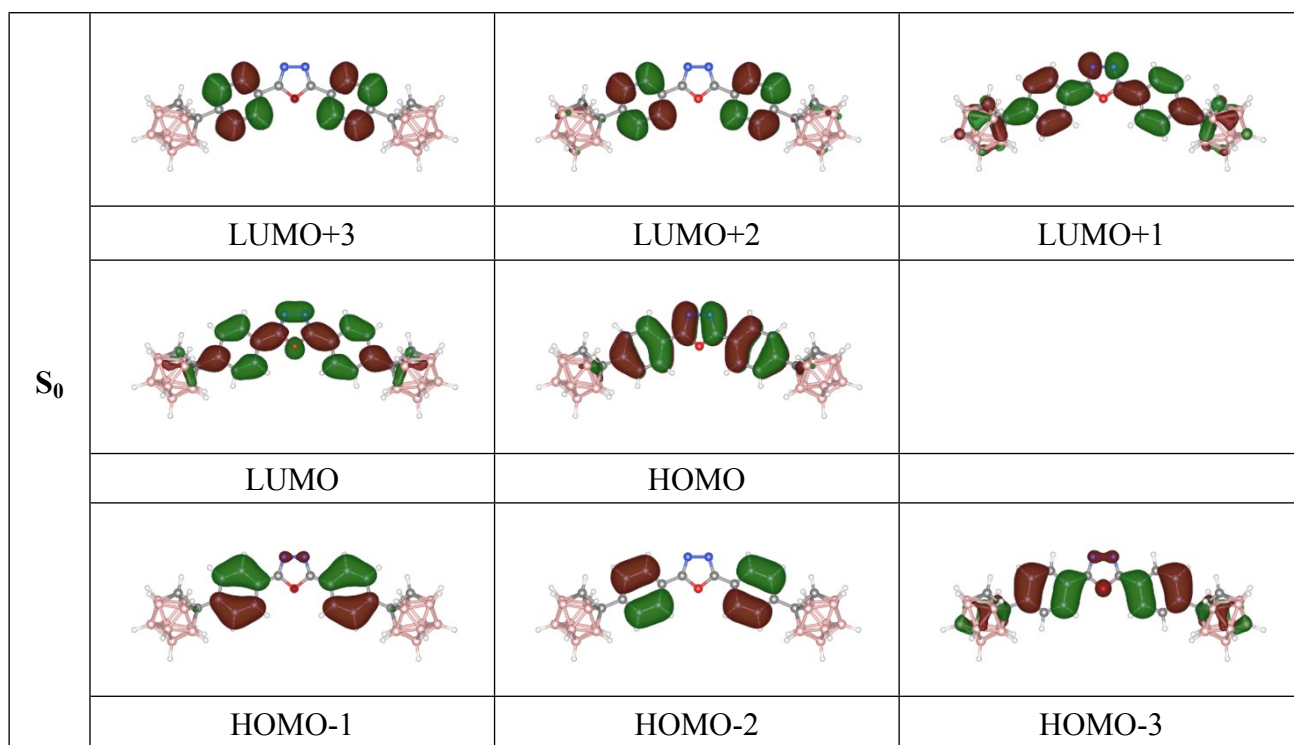

**Fig. S14.** Frontier molecular orbitals of *closo*-OXD1 from IEFPCM-TD-B3LYP calculations (solvent: THF) at the ground state ( $S_0$ ) optimized geometry (isovalue = 0.02).

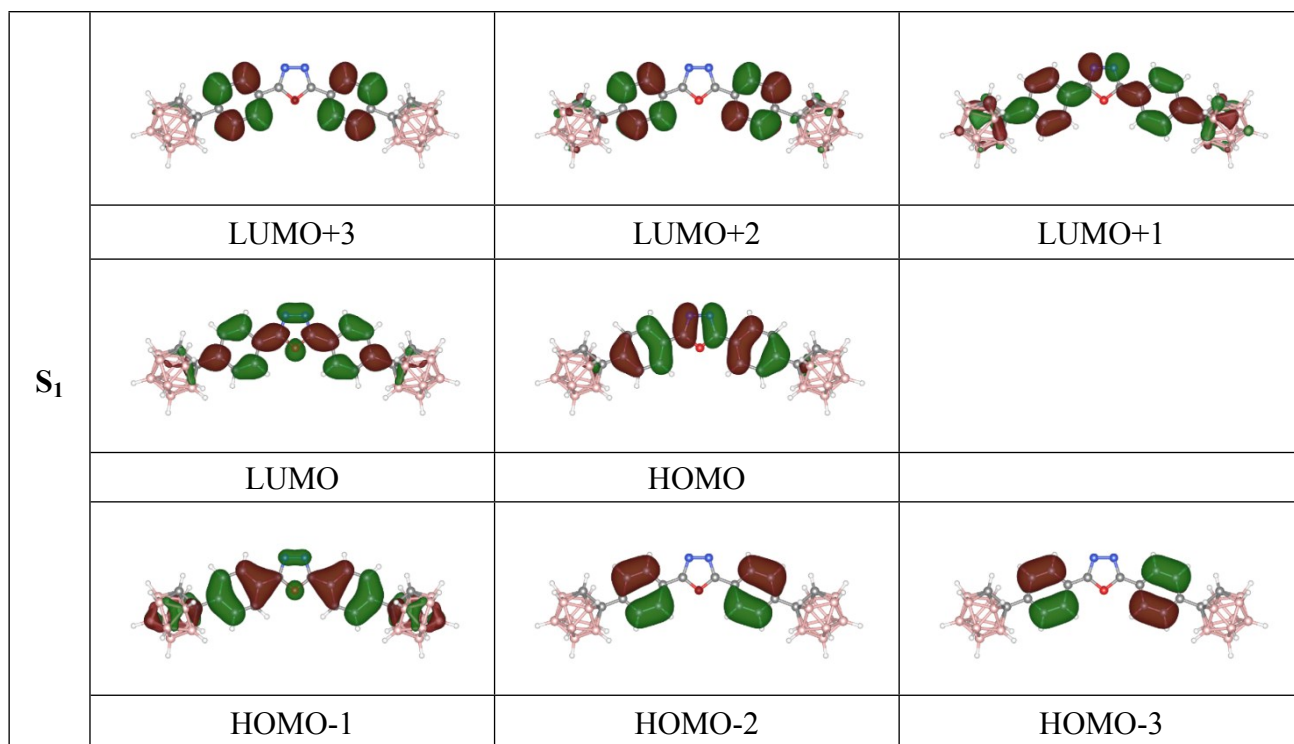

**Fig. S15.** Frontier molecular orbitals of *closo*-OXD1 from IEFPCM-TD-B3LYP calculations (solvent: THF) at the lowest singlet excited state ( $S_1$ ) optimized geometry (isovalue = 0.02).

**Table S2.** Molecular orbital energies (in eV) and contributions of moieties (in %) for *closo-OXD1* from IEFPCM-B3LYP calculations (solvent: THF) at the ground state ( $S_0$ ) optimized geometry.

| MO     | Energy | OXD   | Phenylene | <i>closo</i> -CB |
|--------|--------|-------|-----------|------------------|
| LUMO+3 | -0.85  | 0.15  | 92.18     | 7.67             |
| LUMO+2 | -0.87  | 0.41  | 89.96     | 9.63             |
| LUMO+1 | -1.58  | 23.16 | 59.69     | 17.15            |
| LUMO   | -2.24  | 32.60 | 58.10     | 9.29             |
| HOMO   | -6.59  | 37.55 | 56.60     | 5.85             |
| HOMO-1 | -7.58  | 1.67  | 93.34     | 4.99             |
| HOMO-2 | -7.60  | 0.11  | 98.71     | 1.19             |
| HOMO-3 | -7.62  | 4.15  | 83.73     | 12.13            |

**Table S3.** Molecular orbital energies (in eV) and contributions of moieties (in %) for *closo-OXD1* from IEFPCM-TD-B3LYP calculations (solvent: THF) at the lowest singlet excited state ( $S_1$ ) optimized geometry.

| MO     | Energy | OXD   | Phenylene | <i>closo</i> -CB |
|--------|--------|-------|-----------|------------------|
| LUMO+3 | -0.78  | 0.15  | 90.79     | 9.07             |
| LUMO+2 | -0.81  | 0.59  | 87.91     | 11.50            |
| LUMO+1 | -1.67  | 26.85 | 57.12     | 16.03            |
| LUMO   | -2.63  | 34.99 | 56.96     | 8.05             |
| HOMO   | -6.15  | 40.98 | 53.71     | 5.32             |
| HOMO-1 | -7.56  | 7.75  | 77.12     | 15.13            |
| HOMO-2 | -7.66  | 0.25  | 98.36     | 1.39             |
| HOMO-3 | -7.67  | 0.21  | 98.56     | 1.24             |



**Table S4.** Computed absorption and emission wavelengths ( $\lambda_{\text{calc.}}$  in nm) and oscillator strengths ( $f_{\text{calc.}}$ ) for *closo-OXD1* from IEFPCM-TD-B3LYP calculations at the ground ( $S_0$ ) and lowest singlet excited state ( $S_1$ ) optimized geometries.

| Transition            | $\lambda_{\text{calc.}}$ /nm  | $f_{\text{calc.}}$ | Major contribution                                                                                                                          |
|-----------------------|-------------------------------|--------------------|---------------------------------------------------------------------------------------------------------------------------------------------|
| $S_0 \rightarrow S_1$ | 327.5                         | 1.624              | HOMO $\rightarrow$ LUMO (99%)                                                                                                               |
| $S_0 \rightarrow S_2$ | 269.6                         | 0.078              | HOMO $\rightarrow$ LUMO+1 (64%),<br>HOMO-1 $\rightarrow$ LUMO (26%)                                                                         |
| $S_0 \rightarrow S_3$ | 266.6                         | 0.000              | HOMO-2 $\rightarrow$ LUMO (69%),<br>HOMO $\rightarrow$ LUMO+3 (21%)                                                                         |
| $S_0 \rightarrow S_4$ | 266.0                         | 0.001              | HOMO-1 $\rightarrow$ LUMO (29%),<br>HOMO $\rightarrow$ LUMO+1 (25%),<br>HOMO-3 $\rightarrow$ LUMO (23%),<br>HOMO $\rightarrow$ LUMO+2 (16%) |
| $S_1 \rightarrow S_0$ | 407.2<br>(364.5) <sup>a</sup> | 1.789              | HOMO $\rightarrow$ LUMO (99%)                                                                                                               |

<sup>a</sup> For the adiabatic transition corresponding to the 0–0 fluorescence.

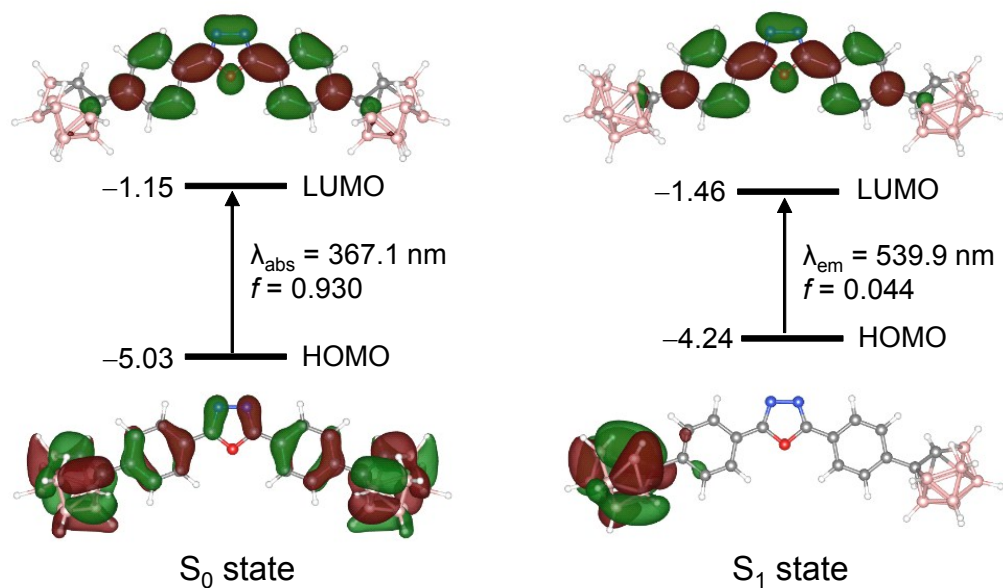

**Fig. S16.** Frontier molecular orbital diagrams and energies (eV) from DFT calculation (PCM in THF) of *nido*-OXD1 (left) in the ground state ( $S_0$ ) and (right) in the lowest singlet excited state ( $S_1$ ) geometries. The transition energy (in nm) was calculated using the TD-B3LYP method.

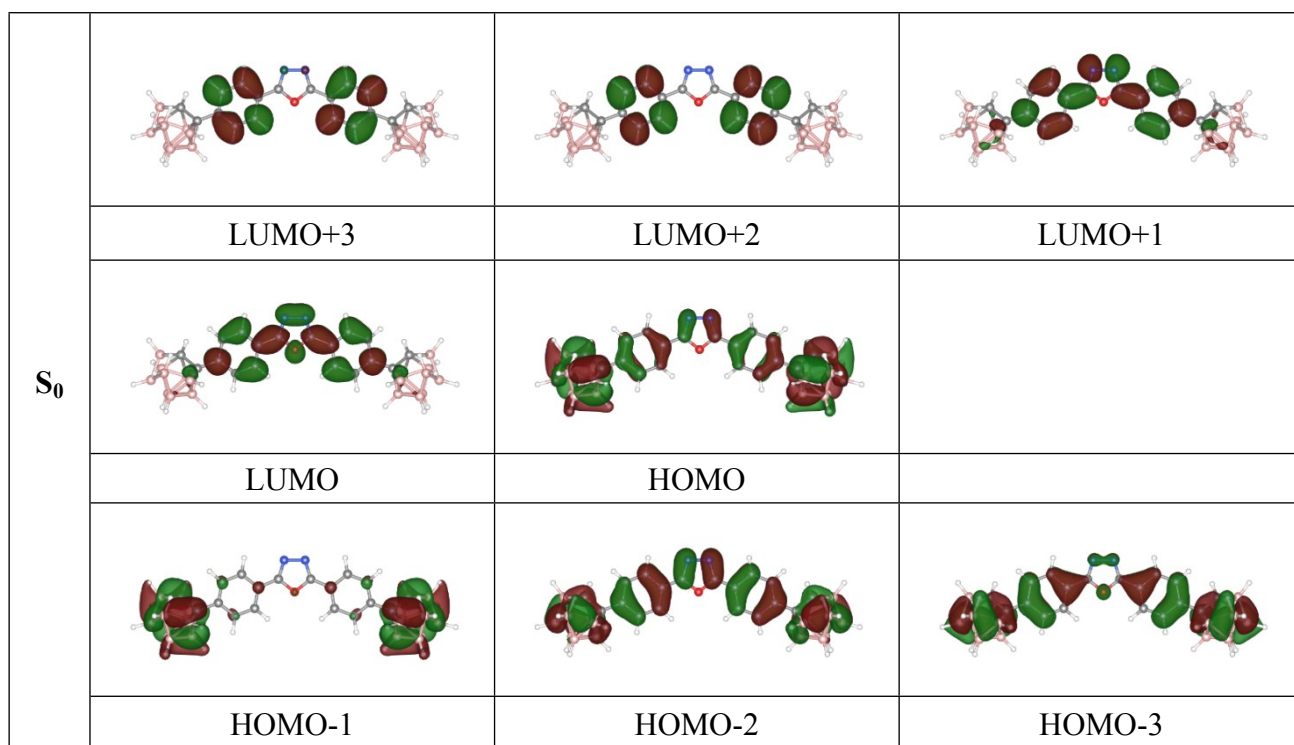

**Fig. S17.** Frontier molecular orbitals of *nido-OXD1* from IEFPCM-TD-B3LYP calculations (solvent: THF) at the ground state ( $S_0$ ) optimized geometry (isovalue = 0.02).

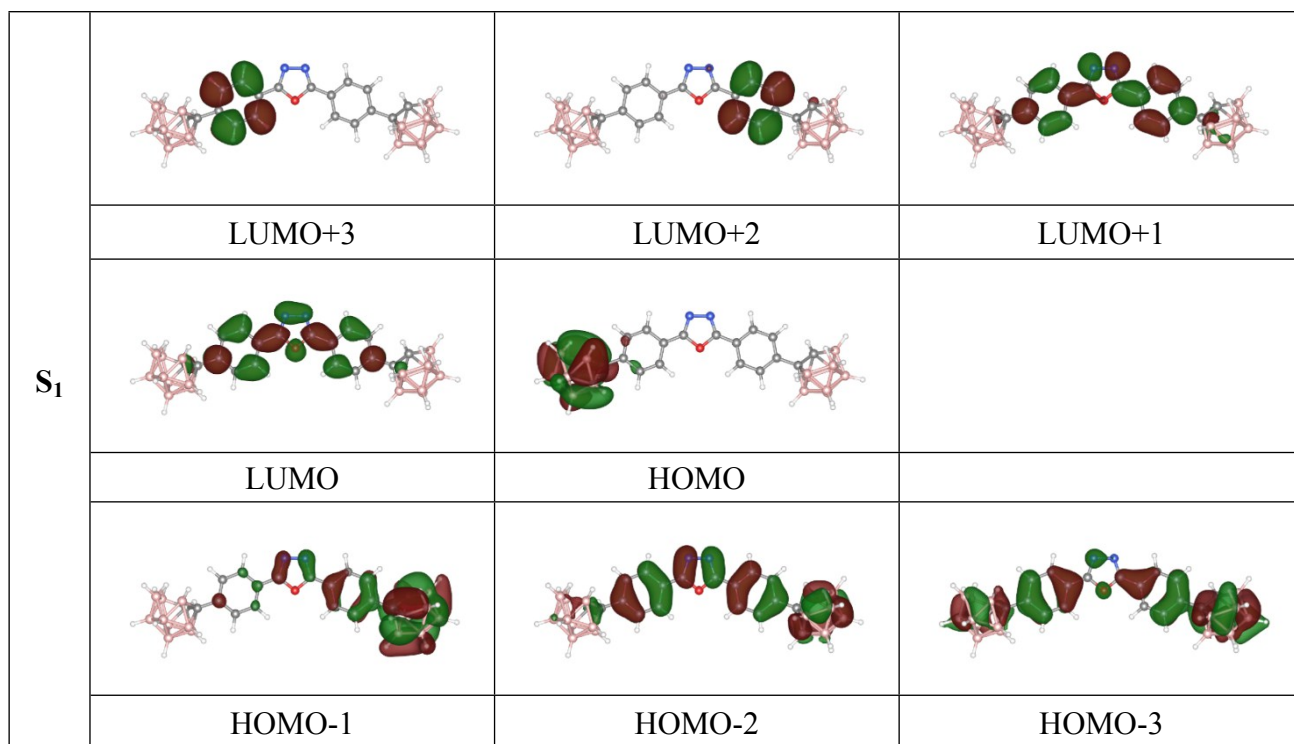

**Fig. S18.** Frontier molecular orbitals of *nido-OXD1* from IEFPCM-TD-B3LYP calculations (solvent: THF) at the lowest singlet excited state ( $S_1$ ) optimized geometry (isovalue = 0.02).

**Table S5.** Molecular orbital energies (in eV) and contributions of moieties (in %) for *nido-OXD1* from IEFPCM-B3LYP calculations (solvent: THF) at the ground state ( $S_0$ ) optimized geometry.

| MO     | Energy | OXD   | Phenylene | <i>nido</i> -CB |
|--------|--------|-------|-----------|-----------------|
| LUMO+3 | 0.20   | 0.41  | 96.82     | 2.78            |
| LUMO+2 | 0.19   | 0.11  | 97.21     | 2.68            |
| LUMO+1 | -0.44  | 32.10 | 61.47     | 6.43            |
| LUMO   | -1.15  | 39.46 | 55.34     | 5.20            |
| HOMO   | -5.03  | 6.06  | 15.91     | 78.02           |
| HOMO-1 | -5.12  | 0.50  | 4.60      | 94.91           |
| HOMO-2 | -5.55  | 20.73 | 40.46     | 38.81           |
| HOMO-3 | -6.11  | 3.58  | 43.81     | 52.61           |

**Table S6.** Molecular orbital energies (in eV) and contributions of moieties (in %) for *nido-OXD1* from IEFPCM-TD-B3LYP calculations (solvent: THF) at the lowest singlet excited state ( $S_1$ ) optimized geometry.

| MO     | Energy | OXD   | Phenylene | <i>nido</i> -CB |
|--------|--------|-------|-----------|-----------------|
| LUMO+3 | 0.20   | 0.15  | 96.62     | 3.23            |
| LUMO+2 | 0.18   | 0.19  | 96.91     | 2.90            |
| LUMO+1 | -0.55  | 33.71 | 61.32     | 4.97            |
| LUMO   | -1.46  | 40.40 | 55.70     | 3.90            |
| HOMO   | -4.24  | 0.21  | 1.33      | 98.45           |
| HOMO-1 | -5.08  | 5.23  | 12.54     | 82.23           |
| HOMO-2 | -5.46  | 27.44 | 45.92     | 26.64           |
| HOMO-3 | -6.27  | 5.63  | 47.32     | 47.04           |

**Table S7.** Computed absorption and emission wavelengths ( $\lambda_{\text{calc.}}$  in nm) and oscillator strengths ( $f_{\text{calc.}}$ ) for *nido*-**OXD1** from IEFPCM-TD-B3LYP calculations at the ground ( $S_0$ ) and lowest singlet excited state ( $S_1$ ) optimized geometries.

| Transition            | $\lambda_{\text{calc.}}$ /nm  | $f_{\text{calc.}}$ | Major contribution                |
|-----------------------|-------------------------------|--------------------|-----------------------------------|
| $S_0 \rightarrow S_1$ | 367.1                         | 0.930              | HOMO $\rightarrow$ LUMO (95%)     |
| $S_0 \rightarrow S_2$ | 351.2                         | 0.028              | HOMO-1 $\rightarrow$ LUMO (97%)   |
| $S_0 \rightarrow S_3$ | 319.6                         | 0.728              | HOMO-2 $\rightarrow$ LUMO (96%)   |
| $S_0 \rightarrow S_4$ | 295.9                         | 0.029              | HOMO $\rightarrow$ LUMO+1 (93%)   |
| $S_0 \rightarrow S_5$ | 290.2                         | 0.094              | HOMO-1 $\rightarrow$ LUMO+1 (94%) |
| $S_1 \rightarrow S_0$ | 539.9<br>(423.1) <sup>a</sup> | 0.044              | HOMO $\rightarrow$ LUMO (98%)     |

<sup>a</sup> For the adiabatic transition corresponding to the 0–0 fluorescence.

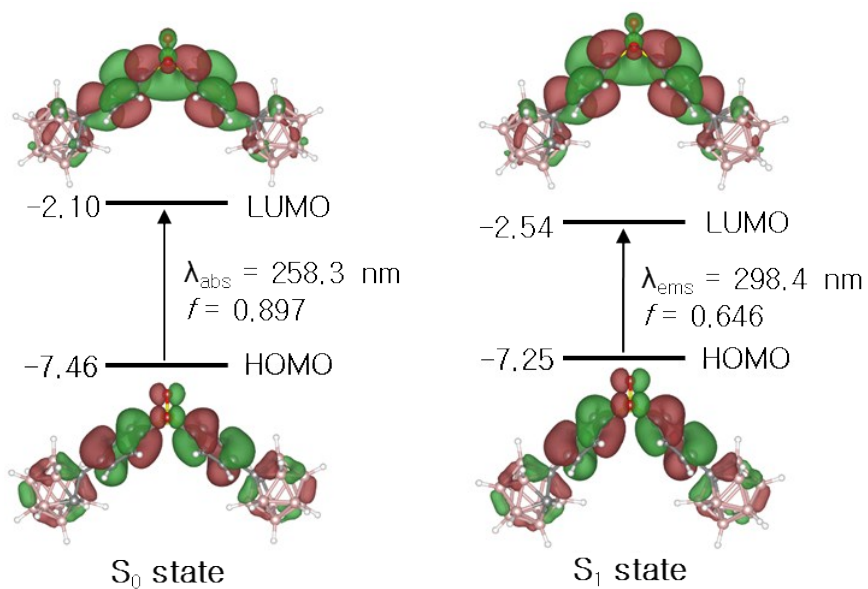

**Fig. S19.** Frontier molecular orbital diagrams and energies (eV) from DFT calculation (PCM in THF) of *closo-DPS1* (left) in the ground state ( $S_0$ ) and (right) in the lowest singlet excited state ( $S_1$ ) geometries. The transition energy (in nm) was calculated using the TD-B3LYP method.

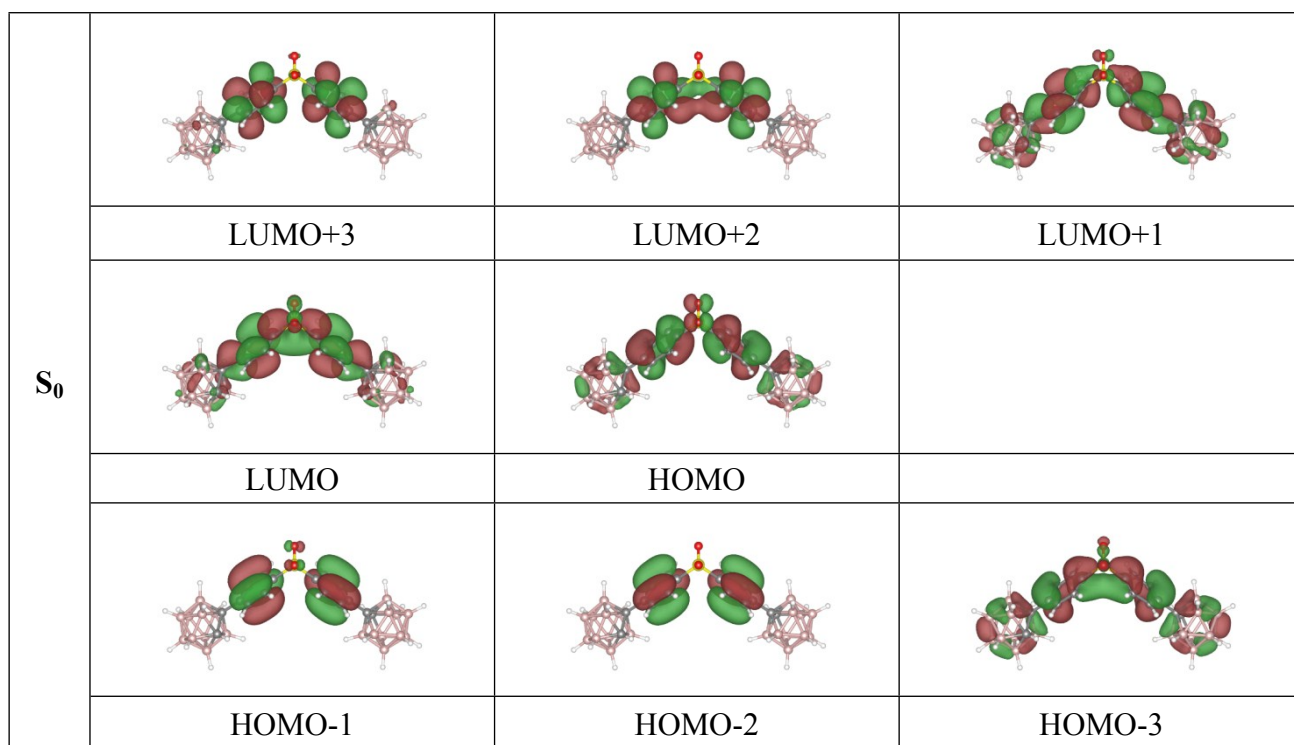

**Fig. S20.** Frontier molecular orbitals of *closo-DPS1* from IEFPCM-TD-B3LYP calculations (solvent: THF) at the ground state ( $S_0$ ) optimized geometry (isovalue = 0.02).

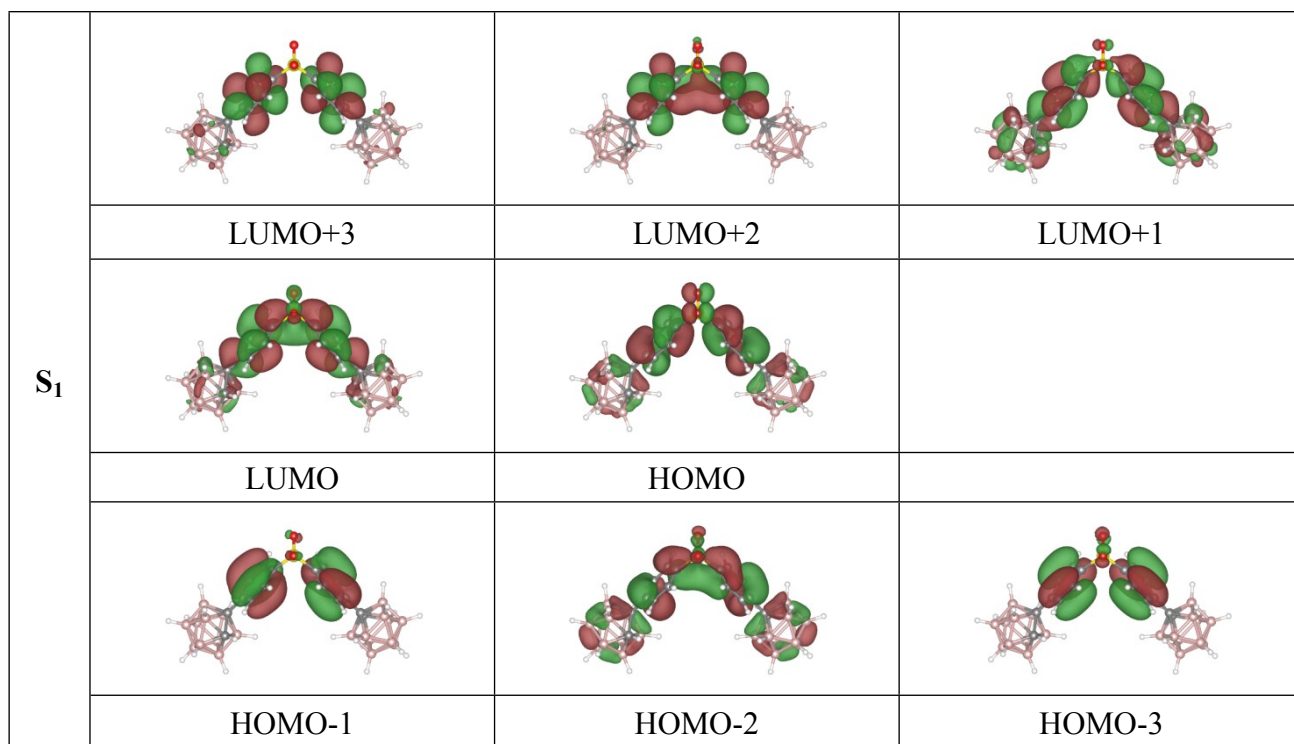

**Fig. S21.** Frontier molecular orbitals of *closo-DPS1* from IEFPCM-TD-B3LYP calculations (solvent: THF) at the lowest singlet excited state ( $S_1$ ) optimized geometry (isovalue = 0.02).

**Table S8.** Molecular orbital energies (in eV) and contributions of moieties (in %) for *closo-DPS1* from IEFPCM-B3LYP calculations (solvent: THF) at the ground state ( $S_0$ ) optimized geometry.

| MO     | Energy | Sulfonyl | Phenylene | <i>closo</i> -CB |
|--------|--------|----------|-----------|------------------|
| LUMO+3 | -0.95  | 0.22     | 91.12     | 8.66             |
| LUMO+2 | -1.19  | 0.57     | 93.24     | 6.20             |
| LUMO+1 | -1.41  | 2.68     | 70.01     | 27.32            |
| LUMO   | -2.10  | 8.82     | 77.50     | 13.68            |
| HOMO   | -7.46  | 5.41     | 81.39     | 13.20            |
| HOMO-1 | -7.72  | 1.20     | 97.56     | 1.25             |
| HOMO-2 | -7.81  | 0.06     | 98.65     | 1.29             |
| HOMO-3 | -7.99  | 3.35     | 73.78     | 22.87            |

**Table S9.** Molecular orbital energies (in eV) and contributions of moieties (in %) for *closo-DPS1* from IEFPCM-TD-B3LYP calculations (solvent: THF) at the lowest singlet excited state ( $S_1$ ) optimized geometry.

| MO     | Energy | Sulfonyl | Phenylene | <i>closo</i> -CB |
|--------|--------|----------|-----------|------------------|
| LUMO+3 | -0.84  | 0.10     | 89.30     | 10.59            |
| LUMO+2 | -1.20  | 1.91     | 91.87     | 6.22             |
| LUMO+1 | -1.65  | 2.32     | 73.00     | 24.68            |
| LUMO   | -2.54  | 8.40     | 79.78     | 11.82            |
| HOMO   | -7.25  | 7.32     | 80.87     | 11.81            |
| HOMO-1 | -7.83  | 0.91     | 96.23     | 2.86             |
| HOMO-2 | -7.90  | 3.86     | 77.17     | 18.98            |
| HOMO-3 | -7.96  | 1.88     | 96.61     | 1.51             |



**Table S10.** Computed absorption and emission wavelengths ( $\lambda_{\text{calc.}}$  in nm) and oscillator strengths ( $f_{\text{calc.}}$ ) for *closo-DPS1* from IEFPCM-TD-B3LYP calculations at the ground ( $S_0$ ) and lowest singlet excited state ( $S_1$ ) optimized geometries.

| Transition            | $\lambda_{\text{calc.}}$ /nm  | $f_{\text{calc.}}$ | Major contribution                                                     |
|-----------------------|-------------------------------|--------------------|------------------------------------------------------------------------|
| $S_0 \rightarrow S_1$ | 258.3                         | 0.897              | HOMO $\rightarrow$ LUMO (98.5%)                                        |
| $S_0 \rightarrow S_2$ | 252.9                         | 0.001              | HOMO-1 $\rightarrow$ LUMO (77.3%)<br>HOMO $\rightarrow$ LUMO+2 (15.5%) |
| $S_0 \rightarrow S_3$ | 248.2                         | 0.050              | HOMO-2 $\rightarrow$ LUMO (77.0%)<br>HOMO $\rightarrow$ LUMO+3 (12.2%) |
| $S_0 \rightarrow S_4$ | 232.7                         | 0.097              | HOMO-4 $\rightarrow$ LUMO (97.4%)                                      |
| $S_0 \rightarrow S_5$ | 230.1                         | 0.097              | HOMO-3 $\rightarrow$ LUMO (87.6%)                                      |
| $S_1 \rightarrow S_0$ | 298.4<br>(258.2) <sup>a</sup> | 0.646              | HOMO $\rightarrow$ LUMO (98.9%)                                        |

<sup>a</sup> For the adiabatic transition corresponding to the 0–0 fluorescence.

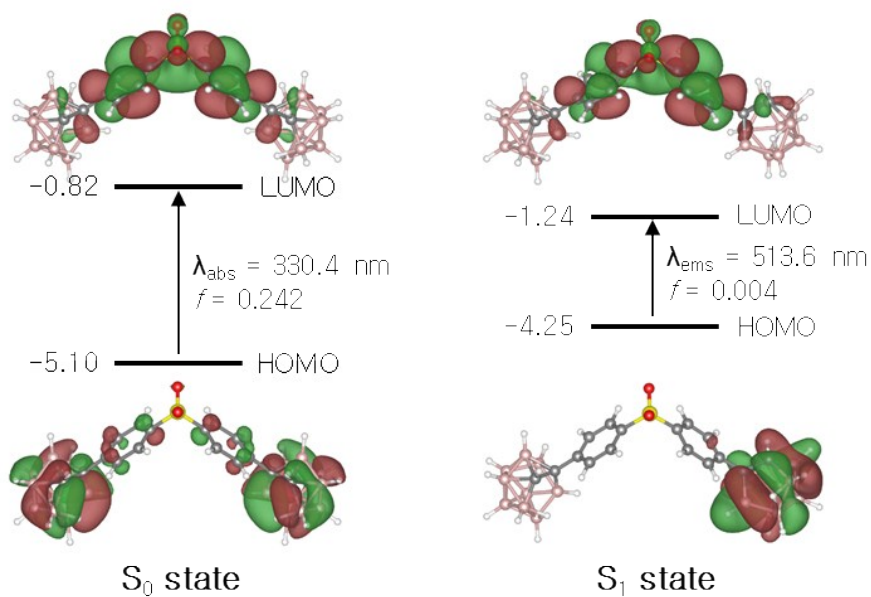

**Fig. S22.** Frontier molecular orbital diagrams and energies (eV) from DFT calculation (PCM in THF) of *nido-DPS1* (left) in the ground state ( $S_0$ ) and (right) in the lowest singlet excited state ( $S_1$ ) geometries. The transition energy (in nm) was calculated using the TD-B3LYP method.

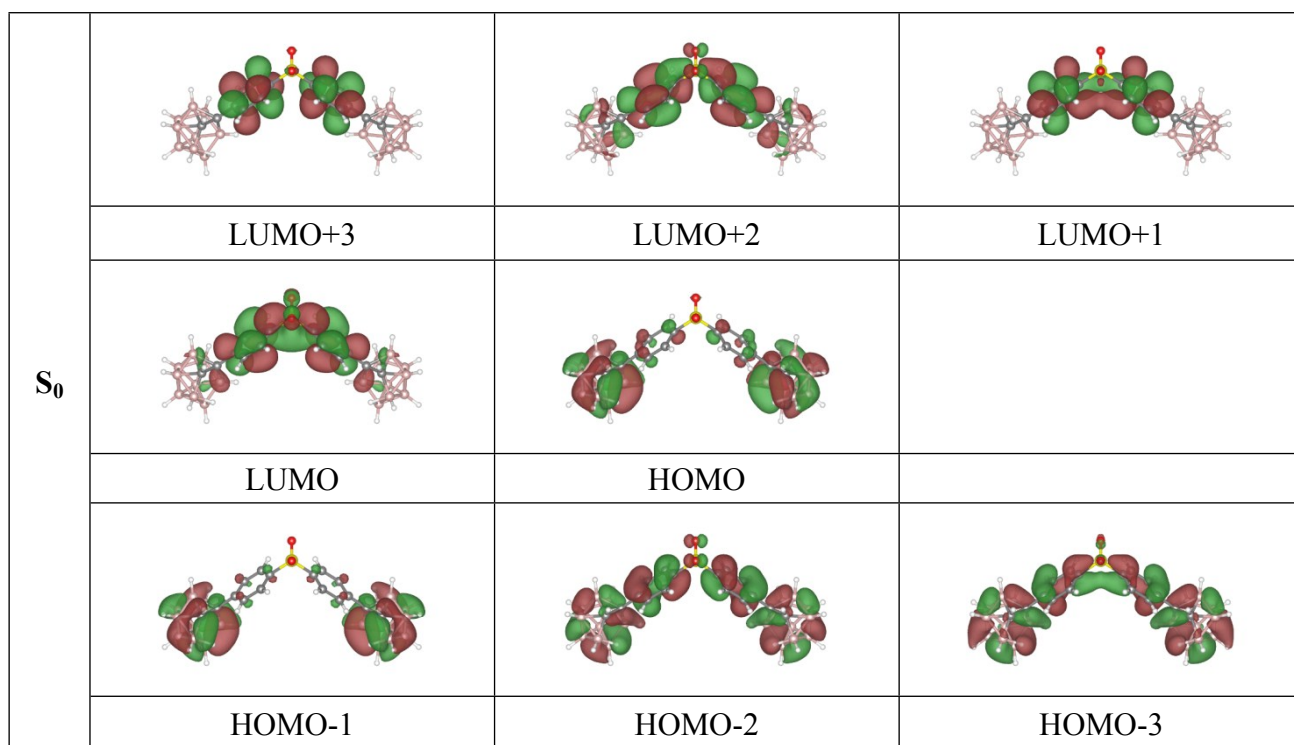

**Fig. S23.** Frontier molecular orbitals of *nido-DPS1* from IEFPCM-TD-B3LYP calculations (solvent: THF) at the ground state ( $S_0$ ) optimized geometry (isovalue = 0.02).

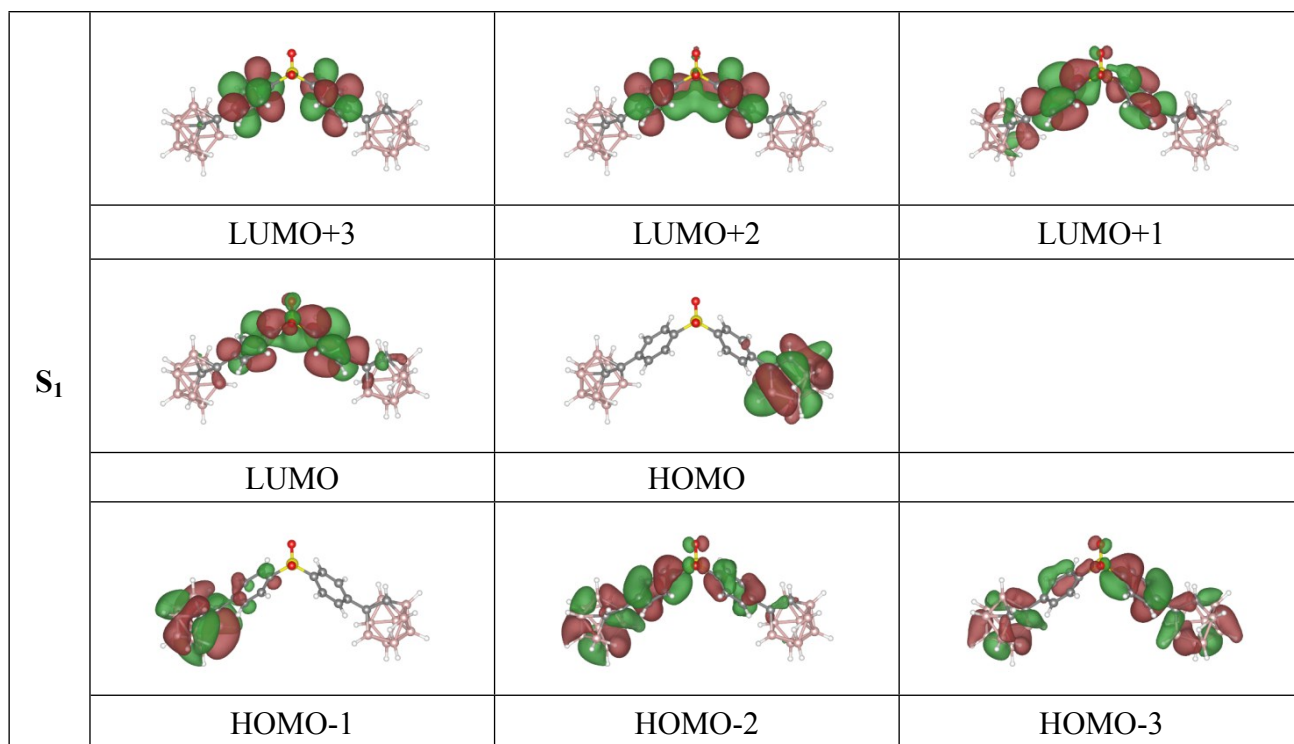

**Fig. S24.** Frontier molecular orbitals of *nido-DPS1* from IEFPCM-TD-B3LYP calculations (solvent: THF) at the lowest singlet excited state ( $S_1$ ) optimized geometry (isovalue = 0.02).

**Table S11.** Molecular orbital energies (in eV) and contributions of moieties (in %) for *nido-DPS1* from IEFPCM-B3LYP calculations (solvent: THF) at the ground state ( $S_0$ ) optimized geometry.

| MO     | Energy | Sulfonyl | Phenylene | <i>nido</i> -CB |
|--------|--------|----------|-----------|-----------------|
| LUMO+3 | 0.19   | 0.23     | 97.18     | 2.59            |
| LUMO+2 | 0.01   | 4.43     | 84.32     | 11.25           |
| LUMO+1 | -0.06  | 0.73     | 97.01     | 2.27            |
| LUMO   | -0.82  | 11.40    | 80.88     | 7.72            |
| HOMO   | -5.10  | 0.24     | 6.97      | 92.78           |
| HOMO-1 | -5.13  | 0.21     | 3.72      | 96.06           |
| HOMO-2 | -5.96  | 1.86     | 51.45     | 46.69           |
| HOMO-3 | -6.24  | 1.65     | 35.08     | 63.27           |

**Table S12.** Molecular orbital energies (in eV) and contributions of moieties (in %) for *nido-DPS1* from IEFPCM-TD-B3LYP calculations (solvent: THF) at the lowest singlet excited state ( $S_1$ ) optimized geometry.

| MO     | Energy | Sulfonyl | Phenylene | <i>nido</i> -CB |
|--------|--------|----------|-----------|-----------------|
| LUMO+3 | 0.18   | 0.18     | 97.20     | 2.62            |
| LUMO+2 | -0.07  | 1.39     | 96.36     | 2.24            |
| LUMO+1 | -0.17  | 4.34     | 86.93     | 8.73            |
| LUMO   | -1.24  | 11.86    | 82.80     | 5.33            |
| HOMO   | -4.25  | 0.01     | 0.78      | 99.21           |
| HOMO-1 | -5.12  | 0.22     | 4.64      | 95.14           |
| HOMO-2 | -6.07  | 3.36     | 55.06     | 41.58           |
| HOMO-3 | -6.54  | 3.01     | 49.59     | 47.40           |

**Table S13.** Computed absorption and emission wavelengths ( $\lambda_{\text{calc.}}$  in nm) and oscillator strengths ( $f_{\text{calc.}}$ ) for *nido-DPS1* from IEFPCM-TD-B3LYP calculations at the ground ( $S_0$ ) and lowest singlet excited state ( $S_1$ ) optimized geometries.

| Transition            | $\lambda_{\text{calc.}}/\text{nm}$ | $f_{\text{calc.}}$ | Major contribution                                                       |
|-----------------------|------------------------------------|--------------------|--------------------------------------------------------------------------|
| $S_0 \rightarrow S_1$ | 330.4                              | 0.2416             | HOMO $\rightarrow$ LUMO (96.7%)                                          |
| $S_0 \rightarrow S_2$ | 325.4                              | 0.0783             | HOMO-1 $\rightarrow$ LUMO (96.9%)                                        |
| $S_0 \rightarrow S_3$ | 278.8                              | 0.0017             | HOMO $\rightarrow$ LUMO+1 (80.6%)<br>HOMO-1 $\rightarrow$ LUMO+3 (16.1%) |
| $S_0 \rightarrow S_4$ | 277.1                              | 0.0063             | HOMO-1 $\rightarrow$ LUMO+1 (75.0%)<br>HOMO $\rightarrow$ LUMO+3 (22.9%) |
| $S_0 \rightarrow S_5$ | 270.5                              | 0.6668             | HOMO-2 $\rightarrow$ LUMO (93.2%)                                        |
| $S_1 \rightarrow S_0$ | 513.6<br>(374.2) <sup>a</sup>      | 0.0041             | HOMO $\rightarrow$ LUMO (98.1%)                                          |

<sup>a</sup> For the adiabatic transition corresponding to the 0–0 fluorescence.
